1 **Disinfection of SARS-CoV-2 using UVC reveals wavelength sensitivity contributes towards**  
2 **rapid virucidal activity**

3 Richard M. Mariita, MSc., Ph.D.\*<sup>1</sup>, Amy C. Wilson Miller, MS, MBA<sup>1</sup>, Rajul V. Randive<sup>2</sup>, Ph.D.,  
4 MBA

5 <sup>1</sup>Product Engineering Department, Crystal IS Inc., an Asahi Kasei company, 70 Cohoes Avenue,  
6 Green Island, New York, 12183, USA

7 <sup>2</sup>Applications Engineering Department, Crystal IS Inc., an Asahi Kasei company, 70 Cohoes  
8 Avenue, Green Island, New York, USA

9 \*Corresponding author: [Richard.mariita@cisuvc.com](mailto:Richard.mariita@cisuvc.com) Phone: +1-518-605-9016

10

11 **Abstract**

12 SARS-CoV-2 is a pathogen that can be disinfected using UVC. For effective inactivation strategies,  
13 design and implementation of UVC disinfection, knowledge of wavelength sensitivity, and  
14 disinfection rate of the relevant pathogen are required. This study aimed to determine the  
15 inactivation profile of SARS-CoV-2 using UVC irradiation with different wavelengths, in addition  
16 to validating surrogate models for SARS-CoV-2. Specifically, the study determined dosage,  
17 inactivation levels, and wavelength sensitivity of SARS-CoV-2. Assessment of SARS-CoV-2  
18 (Strain USA/WA1-2020) inactivation at peak wavelength of 259, 268, 270, 275 and 280 nm was  
19 performed using plaque assay method. The UVC dose of 3.1 mJ/cm<sup>2</sup> using 259 and 268 nm arrays  
20 yielded LRV2.32 and LRV2.44 respectively. With a dose of 5mJ/cm<sup>2</sup>, arrays of peak wavelengths  
21 at 259 and 268 nm obtained similar inactivation (LRV2.97 and LRV 2.80 respectively). The  
22 remaining arrays of longer wavelength, 270, 275 and 280 nm, demonstrated lower performances  
23 (LRV2.0 or less) with 5mJ/cm<sup>2</sup>. Additional study with the 268 nm array revealed that a dose of 6.25  
24 mJ/cm<sup>2</sup> (with 5 seconds or irradiation) is enough to obtain LRV3. These results determine that 259

**NOTE: This preprint reports new research that has not been certified by peer review and should not be used to guide clinical practice.**

1 and 268 nm are the most efficient wavelengths compared to longer UVC wavelengths, allowing the  
2 calculation of disinfection systems efficacy, and providing a benchmark for surrogates.

3

4 **Keywords:** Covid-19, Inactivation, Public health, SARS-CoV-2, UVC, Wavelength sensitivity

5

## 1 **Background**

2 Covid-19, a pandemic disease caused by the severe acute respiratory syndrome  
3 coronavirus 2 (SARS-CoV-2), has been determined to be highly susceptible to ultraviolet light [1].  
4 At wavelengths between 100 and 280 nm (UVC range), viral inactivation is achieved by  
5 photochemical damage to nucleic acids, which results in reduced or inhibited viral replication [2].  
6 Because UVC products are small and quiet, can disinfect surfaces as well as air, and are  
7 increasingly efficient, interest has increased dramatically [3]. Due to this increased interest in UVC  
8 products [4], evaluations to determine efficacy of room sanitization by UVC are being carried out  
9 [5] and the user feedback after in-use testing for prevention of hospital acquired infections is  
10 enthusiastic [6]. Recent findings have shown effective inactivation of SARS-CoV-2 by UVC  
11 irradiation at 254 nm using a commercial lamp [7]. One study, utilizing culture media, has  
12 demonstrated that shorter wavelengths are more effective than longer wavelengths  
13 (265nm>280nm>300nm) [8]. This has led to the general understanding that UVC irradiation,  
14 especially in the range between 200-290 nm, has great inactivation potential [9].

15 Unfortunately, the data available do not establish an inactivation profile of SARS-  
16 CoV2 or wavelength sensitivity. This means that system design and implementation requires  
17 guessing as to how much UVC light is needed. It also prevents the use of a surrogate to SARS-  
18 CoV2 in testing, thus requiring dangerous, expensive, and difficult tests for validation. In the  
19 present study, we describe experiments conducted to investigate wavelength sensitivity of SARS-  
20 CoV-2 on surface. The study investigated the inactivation rates of SARS-CoV-2 at a range of UVC  
21 wavelengths (259, 268, 270, 275 and 280 nm) with closely similar doses in a controlled and  
22 repeatable manner.

23

## 24 **Material and methods**

25 A USB4000 photospectrometer (Ocean Optics, <https://www.oceaninsight.com/>) and  
26 X1 handheld optometer (Gigahertz-Optik, <https://www.gigahertz-optik.com/en-us/product/x1/>)

1 were used to confirm emitted radiation peak wavelength and UVC dose of the UVC arrays  
2 respectively. Experiments were carried out in a biosafety level 4 laboratory of the National  
3 Emerging Infectious Diseases Laboratories of Boston University (<https://www.bu.edu/neidl/>).  
4 Specifically, 100  $\mu\text{L}$  SARS-CoV-2 ( $7.33 \times 10^3$  PFU/mL) (USA/WA1-2020) [10] was plated onto  
5 the surface of 60 mm plastic coupons (tissue culture dishes) in 5  $\mu\text{L}$  aliquots. The virus was then  
6 dried in the biosafety cabinet in the dark before irradiating with UVC LED arrays.

7 A pair of tissue culture dishes (one to be irradiated and one control wrapped tightly in  
8 aluminum foil) were placed in the chamber of the device and UVC irradiated for a specified number  
9 of seconds, with each irradiation time tested in triplicate and averages used in statistical analyses.  
10 Following treatment, the virus was resuspended in 2 mL high glucose Dulbecco's Modified Eagle  
11 Medium (DMEM) (Gibco) containing 0.04 mM phenol red, 1  $\times$  antibiotic-antimycotic (Gibco), 1  $\times$   
12 non-essential amino acids (Gibco), 1  $\times$  GlutaMAX-I (Gibco), 1 mM sodium pyruvate (Gibco) and  
13 2% fetal bovine serum (FBS)(Gibco). The resuspended virus was then serially diluted from  $1 \times 10^0$   
14 to  $1 \times 10^{-2.5}$  using half-logarithmic dilutions before performing a plaque assay after inactivation  
15 with UVC at a specific height, dose and time (Table 1). Semi-solid overlay plaque assay was  
16 carried out following Honko et al.,[11] protocol. Quantitation of plaques was carried out to  
17 determine viral titer, which was used to calculate log reduction value (LRV).

18  
19 *Virus titer in PFU/mL = Number of plaques /virus dilution in well  $\times$  volume plated in mL [7] and*

20 
$$LRV = \text{Log}_{10} \left( \frac{A}{B} \right)$$

21 *Where A=CFU/mL for UVC controls (control wrapped tightly in aluminum foil)*

22 *B =CFU/mL for UVC dosed (UCV irradiated)*

## 23 **Results and discussion**

24 The study developed an irradiation apparatus (Fig 1a) to quantitatively analyze  
25 inactivation of SARS-CoV-2 with different wavelengths. A USB4000 photospectrometer (Ocean

- 1 Optics) was used to confirm the emitted radiation peak wavelengths of the UVC LED arrays at 259,
- 2 268, 270, 275 and 280 nm (Fig 1b). The UVC dose was confirmed using X1 handheld optometer
- 3 (Gigahertz-Optik) (Table 1).

1

| UVC wavelength (nm)                  | 259  |      |      | 268   |      |      | 270  |      |      | 275  |      |      | 280  |      |      |
|--------------------------------------|------|------|------|-------|------|------|------|------|------|------|------|------|------|------|------|
| Dose (mJ/cm <sup>2</sup> )           | 1.5  | 3.1  | 5    | 1.6   | 3.3  | 6    | 1.6  | 3.3  | 5    | 1.6  | 3.3  | 5    | 1.6  | 3.3  | 5    |
| Distance (cm)                        | 7    | 7    | 7    | 14    | 14   | 14   | 7    | 7    | 7    | 7    | 7    | 7    | 7    | 7    | 7    |
| Time (Seconds)                       | 7    | 15   | 23   | 3     | 6    | 11   | 4    | 8    | 13   | 4    | 8    | 12   | 4    | 8    | 12   |
| Mean control virus titer (PFU/mL)    | 7500 | 5250 | 7750 | 10667 | 7333 | 9500 | 2727 | 2637 | 3237 | 3203 | 2427 | 2007 | 2480 | 2487 | 2600 |
| Mean irradiated virus titer (PFU/mL) | 217  | 25   | 8    | 383   | 27   | 15   | 377  | 45   | 31   | 912  | 83   | 73   | 1037 | 500  | 237  |
| Log reduction value (LRV)            | 1.54 | 2.32 | 2.97 | 1.44  | 2.44 | 2.80 | 0.86 | 1.77 | 2.02 | 0.55 | 1.47 | 1.44 | 0.38 | 0.69 | 1.04 |

2

3 Table 1: Timepoints, UVC doses obtained at a given distance, and irradiation at different LED wavelengths revealed lower inactivation of SARS-  
4 CoV-2 at >270 nm compared to 259 and 268 nm.

5

1 a).

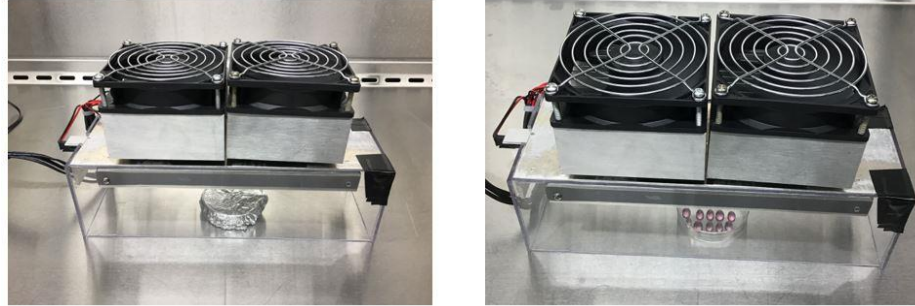

2

3 b).

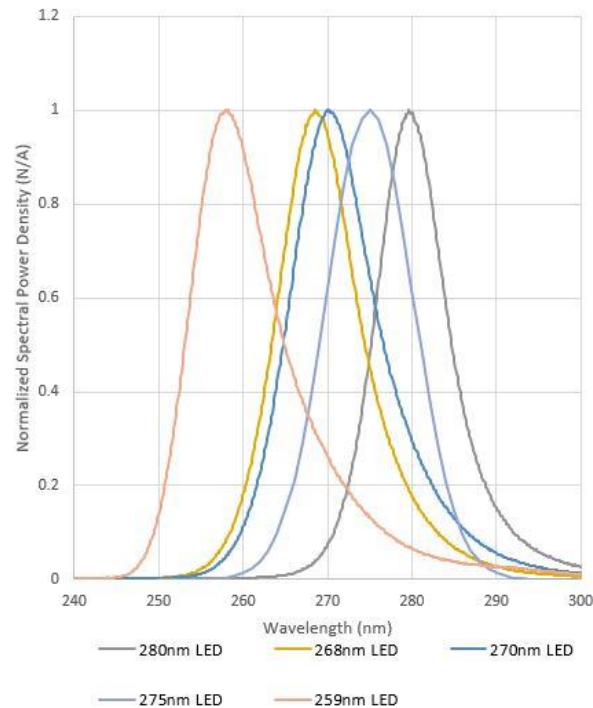

4

5  
6  
7  
8  
9  
10  
11  
12  
13  
14  
15  
16 Fig 1: a). SARS-CoV-2 array set-up for disinfection study. A pair of dishes (one to be irradiated and  
17 one control wrapped tightly in aluminum foil) were placed in the chamber of the device and UVC-  
18 irradiated for a specified number of seconds, with each irradiation time tested in triplicate. Plaque  
19 assay technique was used to test the performance of the arrays. b). Confirmation of wavelength  
20 peak emissions for each array used in the study.

21 SARS-CoV-2 showed high susceptibility to UVC radiation, especially at peak  
22 emissions of 259 and 268 nm (Fig 2). There was strong association between wavelength and  
23 inactivation efficacy of the test arrays. Specifically, within UVC doses of 1.5mJ/cm<sup>2</sup>, 3.1 mJ/cm<sup>2</sup>  
24 and 5mJ/cm<sup>2</sup>, there were significant differences in inactivation efficacy between arrays ( $p=0.0245$ ,

1  $R^2=0.8551$ ,  $p=0.0497$ ,  $R^2=0.7723$  and  $p=0.0186$ ,  $R^2=0.8788$  respectively). Inactivation  
2 performances increased with UVC exposure (dose) (Fig 3). Additionally, because the performance  
3 of 259 and 268 nm arrays was similar, the study went further and confirmed that with  $6.25 \text{ mJ/cm}^2$   
4 in 5 seconds, LRV3 is obtained at 268 nm array. SARS-CoV-2 was reduced to below detectable  
5 levels within 7 seconds at a UVC wavelength of 268 nm.  
6

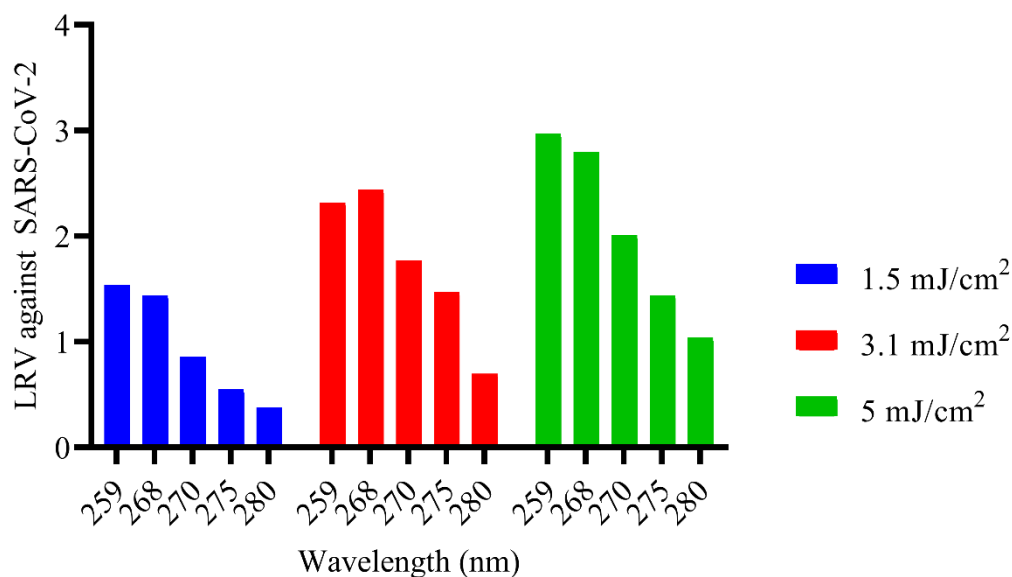

7  
8 Fig 2: Effects of UVC LEDs with different peak emissions on SARS-CoV-2 (Strain USA/WA1-  
9 2020) inactivation. Inactivation efficacy of wavelengths was carried out at similar UVC doses.  
10 Inactivation of SARS-CoV-2 revealed wavelength sensitivity, with the 268 nm array obtaining  
11 comparable performance with the 259 nm.

12



1

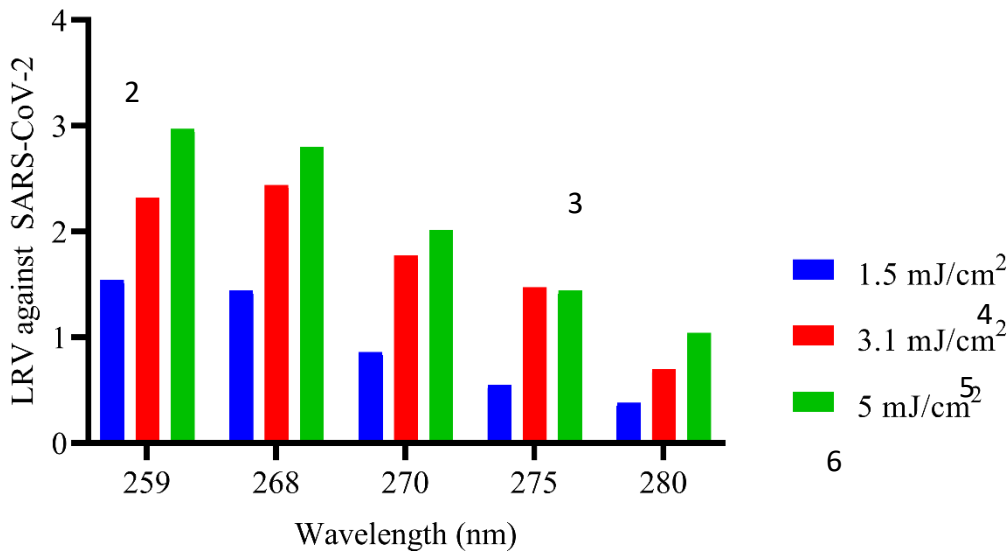

7

8 Fig 3: Effects of low UVC doses on SARS-CoV-2. It was confirmed that an increased in UVC dose  
9 led to increased inactivation.

10 Findings from the current study are consistent with previous findings that UVC is very  
11 effective at inactivating SARS-CoV-2, that shorter wavelengths are more effective, and reveal the  
12 approximate required dosing [1], [7]. These results are somewhat consistent with a study of 280  
13 nm, in which it took 37.5mJ/cm<sup>2</sup> to obtain LRV3 against SARS-CoV-2, in that longer wavelengths  
14 were much less effective [12]. For emphasis, shorter wavelengths easily achieve target inactivation  
15 with less dose [13]. These findings also support the use of HCoV-43 as a surrogate pathogen to  
16 SARS-CoV-2 as used by Gerchman et al., [14].

17 Furthermore, unlike previous studies, the current study employing SARS-CoV-2 and utilizing more  
18 wavelengths enabled a deeper assessment of their inactivation efficiency under similar conditions,  
19 leading to sensitivity determination. This confirms the cumulative benefit of UVC with time even at  
20 low UVC doses found by Pavia et al.,[15] which observed a potentially compounding benefit of  
21 UVC when used over time in long-term care facilities.

22 However, the exact calculation of air disinfection is still not possible because this study only  
23 examines SARS-CoV-2 on dried surfaces and does not explore it as either a particulate or

1 aerosolized SARS-CoV-2. Furthermore, SARS-CoV-2 was considered and therefore these results  
2 may not be used as baseline for other viruses, especially non-enveloped viruses. These findings also  
3 do not account for varied humidity and temperature, nor other types of surfaces. Still, this study  
4 allows the design and implementation of many new UVC systems based on the inactivation profiles  
5 found for varying UVC radiation sources.

6

## 7 **Conclusions**

8           Our findings provide a basic knowledge that SARS-CoV-2 is more sensitive at shorter  
9 wavelengths (<268 nm, as opposed to >270 nm). UVC LEDs with the most effective peak  
10 emissions could serve as effective and rapid tools in the fight against SARS-CoV-2 and other  
11 pathogenic viruses. This is an important result for designing UVC-based solutions, as engineers  
12 need to consider the effectiveness of the wavelengths used and the tolerance around rated peak  
13 wavelength and supports the use of HCoV-43 as a surrogate.

14

## 15 **Data availability**

16 Original SARS-CoV-2 disinfection data and laboratory report is available upon reasonable request.  
17 Spectral confirmation data is available via <https://doi.org/10.6084/m9.figshare.14884743.v1>

18

19 **Competing interest:** R.M. Mariita, A.C.W. Miller and R.V. Randive work for Crystal IS, an Asahi  
20 Kasei company that manufactures UVC LEDs.

21

22 **Author Contributions:** R.M. Mariita, A. C. W. Miller, R. V. Randive: study design; R.M. Mariita:  
23 literature search, data analysis and figure design; R.M. Mariita, A. C. W. Miller: Manuscript writing  
24 and data interpretation; R. V. Randive: supply of study materials. R.M. Mariita, A. C. W. Miller, R.  
25 V. Randive: read, revised and approved final manuscript.

1

2 **Acknowledgements:** Authors especially thank the Boston University's National Emerging

3 Infectious Diseases Laboratories (BSL-4 laboratory), especially Dr. Anthony Griffiths, Dr. Lindsay

4 McKay and Dr. Nadia Storm for utilizing their virology capabilities in the SARS-CoV-2

5 experiments. Authors are also grateful to Dr. Kevin Kahn and James Davis for proofreading the

6 manuscript.

7

## 1 **References**

- 2 1. Heilingloh CS, Aufderhorst UW, Schipper L, et al (2020) Susceptibility of SARS-CoV-2 to UV  
3 irradiation. *American Journal of Infection Control* 48:1273–1275.  
4 <https://doi.org/10.1016/j.ajic.2020.07.031>
- 5 2. Ariza-Mateos A, Prieto-Vega S, Díaz-Toledano R, et al (2012) RNA self-cleavage activated by  
6 ultraviolet light-induced oxidation. *Nucleic Acids Res* 40:1748–1766.  
7 <https://doi.org/10.1093/nar/gkr822>
- 8 3. Casini B, Tuvo B, Cristina ML, et al (2019) Evaluation of an ultraviolet C (UVC) light-emitting  
9 device for disinfection of high touch surfaces in hospital critical areas. *International journal of  
10 environmental research and public health* 16:3572
- 11 4. Kim S-J, Kim D-K, Kang D-H (2015) Using UVC Light-Emitting Diodes at Wavelengths of  
12 266 to 279 Nanometers To Inactivate Foodborne Pathogens and Pasteurize Sliced Cheese. *Appl  
13 Environ Microbiol* 82:11–17. <https://doi.org/10.1128/AEM.02092-15>
- 14 5. Streed S, Joann Andrews B, Price A, et al (2012) Preliminary Assessment: Efficacy of Room  
15 Sanitizing With Controlled Exposure to UVC Light. *American Journal of Infection Control*  
16 40:e70–e71. <https://doi.org/10.1016/j.ajic.2012.04.124>
- 17 6. Li LM, Wong T, Rose E, et al (2016) Evaluation of an ultraviolet C light-emitting device for  
18 disinfection of electronic devices. *American Journal of Infection Control* 44:1554–1557.  
19 <https://doi.org/10.1016/j.ajic.2016.07.028>
- 20 7. Storm N, McKay LGA, Downs SN, et al (2020) Rapid and complete inactivation of SARS-  
21 CoV-2 by ultraviolet-C irradiation. *Scientific Reports* 10:22421.  
22 <https://doi.org/10.1038/s41598-020-79600-8>
- 23 8. Minamikawa T, Koma T, Suzuki A, et al (2021) Quantitative evaluation of SARS-CoV-2  
24 inactivation using a deep ultraviolet light-emitting diode. *Scientific Reports* 11:5070.  
25 <https://doi.org/10.1038/s41598-021-84592-0>
- 26 9. Bhardwaj SK, Singh H, Deep A, et al (2021) UVC-based photoinactivation as an efficient tool  
27 to control the transmission of coronaviruses. *Science of The Total Environment* 148548.  
28 <https://doi.org/10.1016/j.scitotenv.2021.148548>
- 29 10. Harcourt J, Tamin A, Lu X, et al (2020) Severe Acute Respiratory Syndrome Coronavirus 2  
30 from Patient with Coronavirus Disease, United States. *Emerg Infect Dis* 26:1266–1273.  
31 <https://doi.org/10.3201/eid2606.200516>
- 32 11. Honko AN, Storm N, Bean D.J, et al (2020) Rapid Quantification and Neutralization Assays for  
33 Novel Coronavirus SARS-CoV-2 Using Avicel RC-591 Semi-Solid Overlay. reprints  
34 ([www.preprints.org](http://www.preprints.org)). <https://doi.org/doi:10.20944/preprints202005.0264.v1>
- 35 12. Inagaki H, Saito A, Sugiyama H, et al (2020) Rapid inactivation of SARS-CoV-2 with deep-UV  
36 LED irradiation. *Emerging Microbes & Infections* 9:1744–1747.  
37 <https://doi.org/10.1080/22221751.2020.1796529>

- 1 13. Biasin M, Bianco A, Pareschi G, et al (2021) UV-C irradiation is highly effective in  
2 inactivating SARS-CoV-2 replication. *Scientific Reports* 11:6260.  
3 <https://doi.org/10.1038/s41598-021-85425-w>
  - 4 14. Gerchman Y, Mamane H, Friedman N, Mandelboim M (2020) UV-LED disinfection of  
5 Coronavirus: Wavelength effect. *Journal of Photochemistry and Photobiology B: Biology*  
6 212:112044. <https://doi.org/10.1016/j.jphotobiol.2020.112044>
  - 7 15. Pavia M, Simpser E, Becker M, et al (2018) The effect of ultraviolet-C technology on viral  
8 infection incidence in a pediatric long-term care facility. *American Journal of Infection Control*  
9 46:720–722. <https://doi.org/10.1016/j.ajic.2018.01.014>
- 10
